# Supplementary material
Source: publisher site journal article supplement (https://www.spandidos-publications.com/380/downloadSupplementary)
Supplement: Supplementary file 1 [file downloadSupplementary]

Figure S1. EMX2 protein expression in 36 matched pairs of esophageal adenocarcinoma and adjacent normal tissues. Frozen tissues were analyzed, using western blot analysis, for EMX2. GAPDH was used as a loading control. EMX2, empty spiracles homeobox 2; T, tumor; N, adjacent normal tissues.

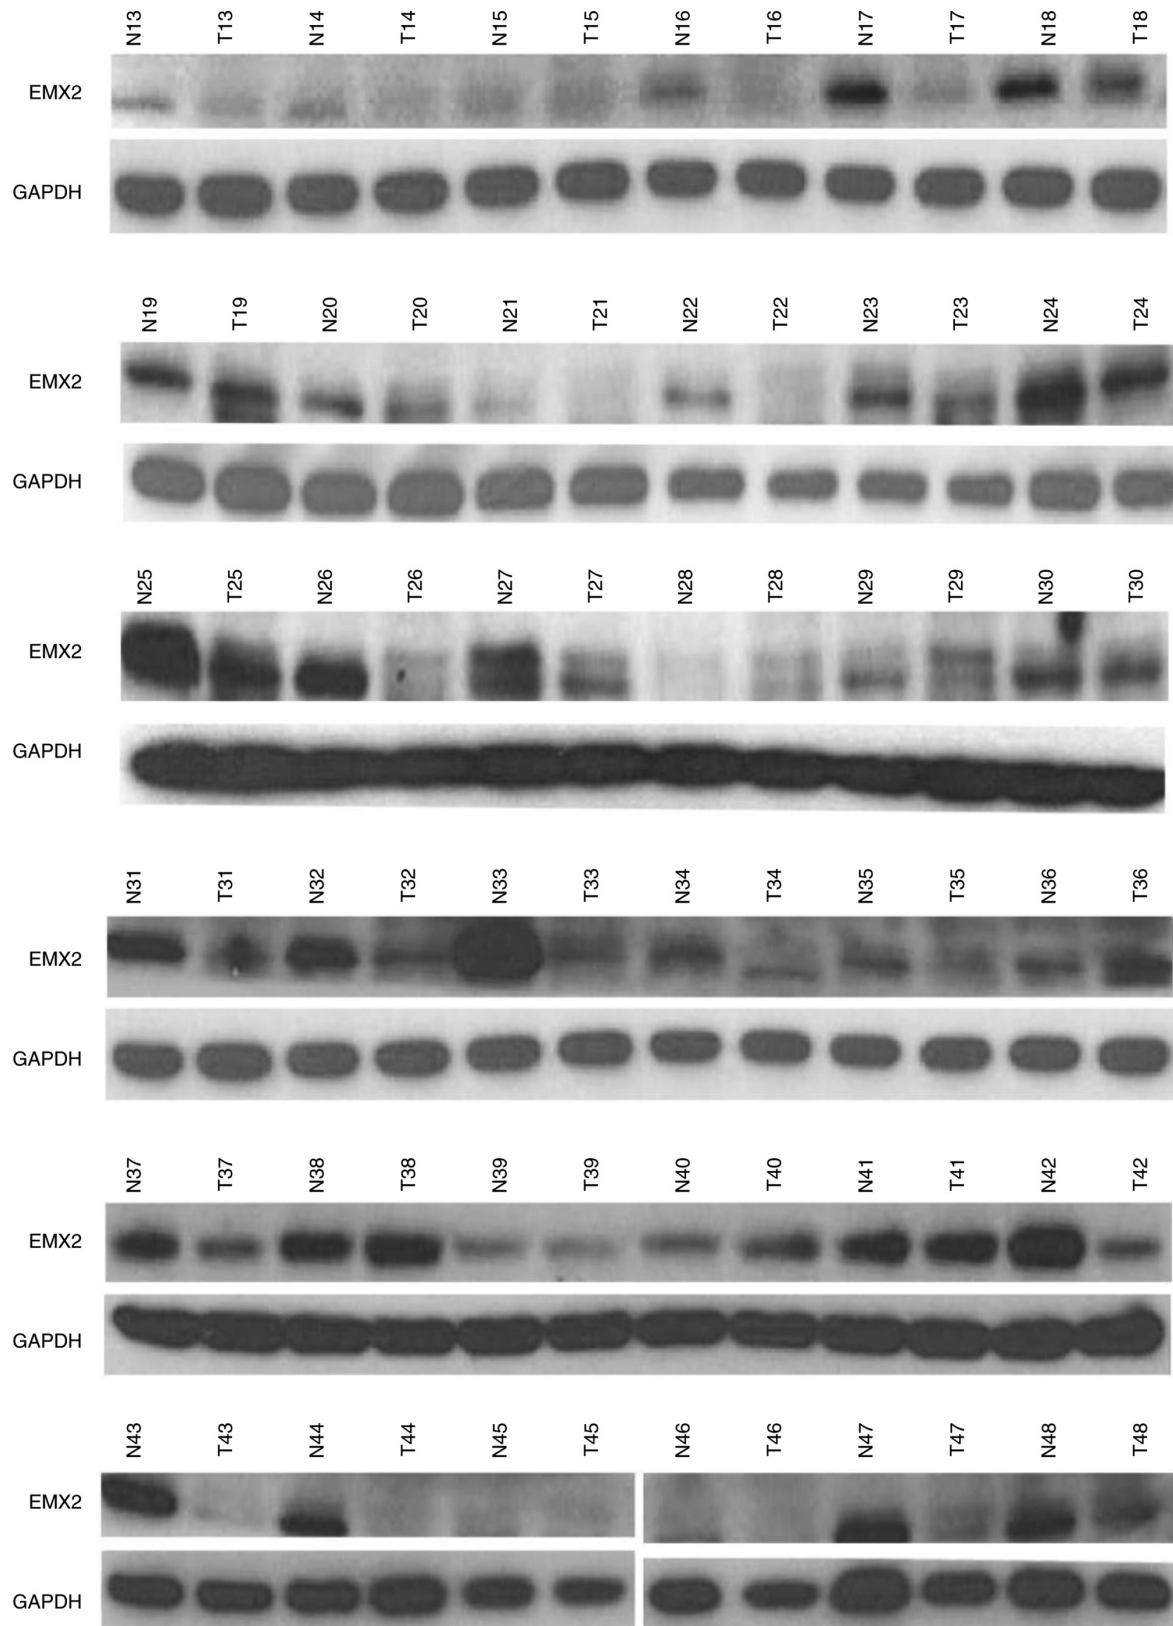

Table SI. Characteristics of 48 EAC patients.

| Characteristics    | Patient Cohort # (%) |
|--------------------|----------------------|
| Number of patients | 48                   |
| Age (years)        | 67.5±10.6            |
| Males              | 29 (60.4)            |
| Females            | 19 (39.6)            |
| Smoking history    |                      |
| Yes                | 22 (45.8)            |
| No                 | 18 (37.5)            |
| Unknown            | 8 (16.7)             |
